# Supplementary material for: Continuous Flow Synthesis of N-Doped Carbon Quantum Dots for Total Phenol Content Detection
Source: MDPI journal article supplement (doi:10.3390/chemosensors10080334), 2022-08-16
Supplement: s1 [file s1]

**Table S1.** The factors and levels of deterministic screening experimental design.

| Factors                      | Symbol | Unit   | Code  |       |       |
|------------------------------|--------|--------|-------|-------|-------|
|                              |        |        | -1    | 0     | 1     |
| Heating temperature          | X1     | °C     | 120   | 160   | 200   |
| Solution flow rate           | X2     | mL/min | 1.0   | 3.0   | 5.0   |
| Raw material content         | X3     | %      | 5     | 10    | 15    |
| Ethylenediamine content      | X4     | %      | 50.00 | 66.67 | 83.33 |
| Tetraethylene glycol content | X5     | %      | 40    | 50    | 60    |

**Table S2.** Deterministic filter design tables and results.

| Experiment | Factors    |                |           |           |           | Response Value                 |
|------------|------------|----------------|-----------|-----------|-----------|--------------------------------|
|            | X1<br>(°C) | X2<br>(mL/Min) | X3<br>(%) | X4<br>(%) | X5<br>(%) | Fluorescence Quantum Yield (%) |
| 1          | 160        | 3.0            | 10        | 66.67     | 50        | 26.95                          |
| 2          | 200        | 5.0            | 15        | 50.00     | 60        | 17.93                          |
| 3          | 120        | 1.0            | 15        | 50.00     | 60        | 10.08                          |
| 4          | 200        | 5.0            | 5         | 50.00     | 50        | 4.414                          |
| 5          | 200        | 1.0            | 15        | 50.00     | 40        | 16.06                          |
| 6          | 120        | 5.0            | 5         | 83.33     | 60        | 13.10                          |
| 7          | 200        | 1.0            | 10        | 83.33     | 60        | 23.75                          |
| 8          | 160        | 1.0            | 5         | 50.00     | 40        | 20.53                          |
| 9          | 120        | 3.0            | 5         | 50.00     | 60        | 26.93                          |
| 10         | 160        | 5.0            | 15        | 83.33     | 60        | 36.16                          |
| 11         | 120        | 5.0            | 15        | 66.67     | 40        | 2.284                          |
| 12         | 200        | 1.0            | 5         | 66.67     | 60        | 22.34                          |
| 13         | 120        | 1.0            | 15        | 83.33     | 50        | 20.59                          |
| 14         | 120        | 1.0            | 5         | 83.33     | 40        | 2.563                          |
| 15         | 200        | 3.0            | 15        | 83.33     | 40        | 23.44                          |
| 16         | 200        | 5.0            | 5         | 83.33     | 40        | 3.132                          |
| 17         | 120        | 5.0            | 10        | 50.00     | 40        | 3.134                          |

**Table S3.** Comparison of the test results of the two testing methods.

| Testing Method     | Chlorogenic Acid Content Equivalent in Unit Mass of Herbs (%) |      |      |      | <i>p</i> -Value |
|--------------------|---------------------------------------------------------------|------|------|------|-----------------|
| PAD method         | 3.28                                                          | 3.35 | 3.37 | 3.42 | 0.398           |
| Total phenol assay | 3.35                                                          | 3.17 | 3.33 | 3.37 |                 |

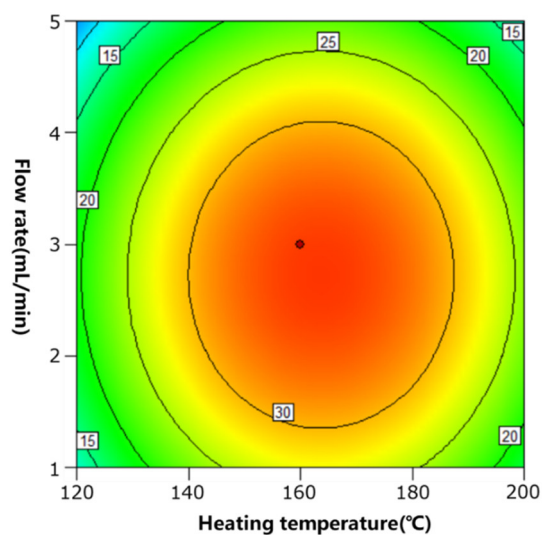

(a)

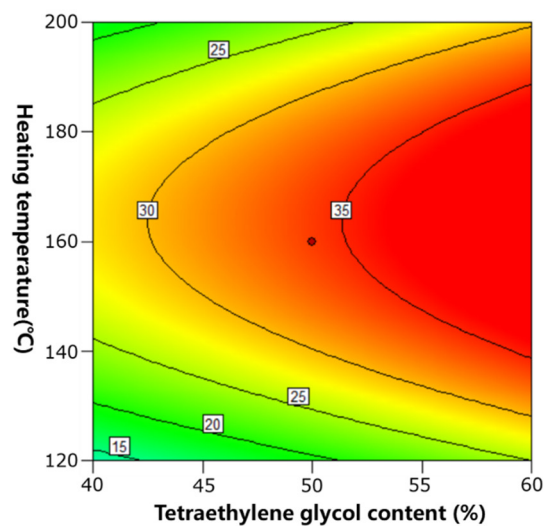

(b)

**Figure S1.** Contour plot of fluorescence yield. (a) Effect of heating temperature and solution flow rate on the fluorescence yield with a tetraethylene glycol concentration of 60%; (b) The effect of tetraethylene glycol content and heating temperature on the fluorescence yield. The solution flow rate was 3 mL/min.
